# Supplementary material
Source: Springer Nature journal article supplement (https://www.springermedizin.de/resource/supplementary/13049_2011_323_MOESM3_ESM.pdf/9666514)

500 m

- H1+H2 = Helicopter landing and reloading area
- C0 = Improvised casualty clearing station on Utøya Island
- C1 = Primary casualty clearing station
- C2 = Secondary casualty clearing station

Storøya island

H1

Direction Sundvolden hotel and Ringerike local hospital

H2

Waiting ambulances

C2

Tyrifjorden lake

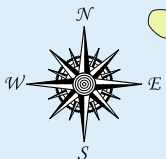

Utøya island

C0

Waiting ambulances

Direction Oslo

C1

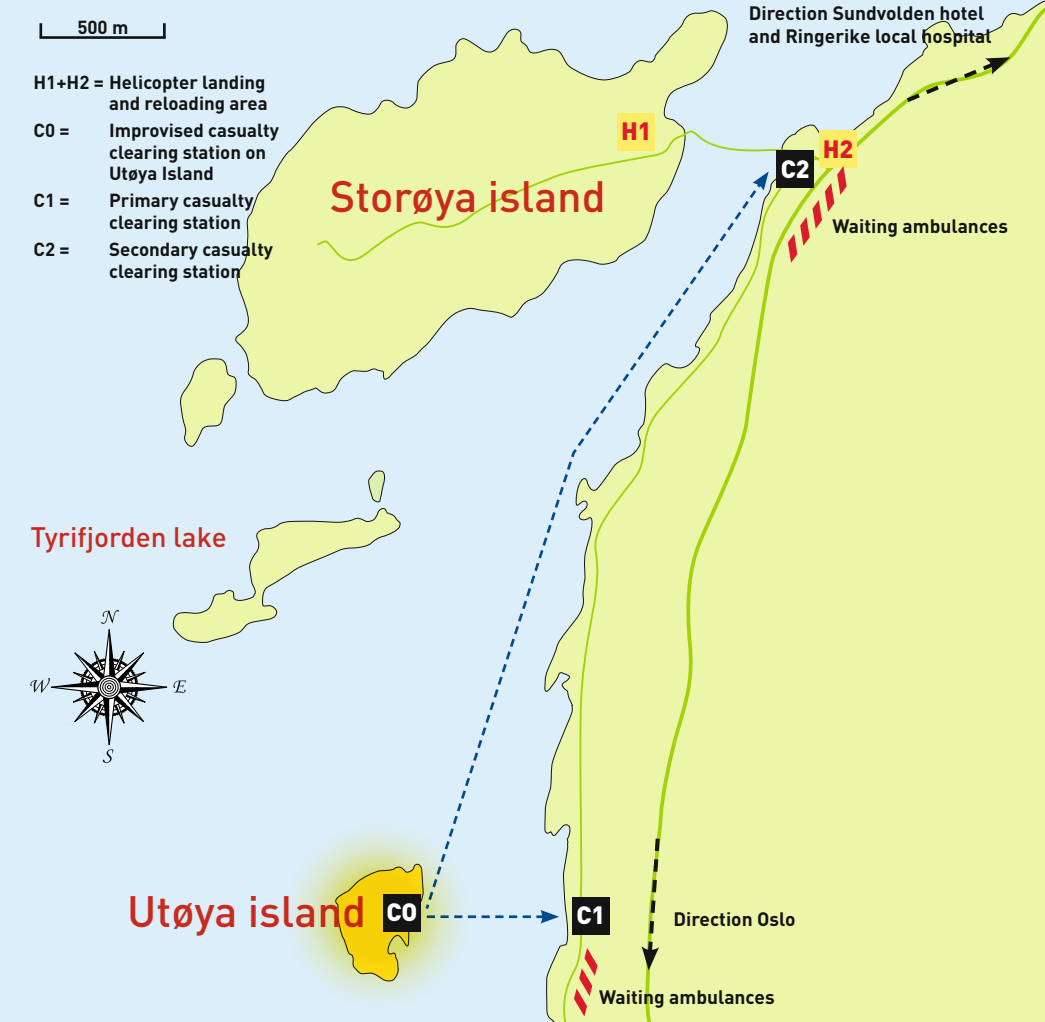

Supplement: MOESM3 [file 9666514]
